# Supplementary material
Source: PubMed Central journal article supplement (PMC307539)
Supplement: mbc_15_1_189__2.pdf [file mbc_15_1_189__2.pdf]

MTM-9

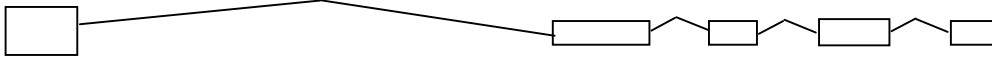

SL1: GGTTTAATTACCCAAGTTTGAG

63  
66  
69  
72  
75  
78  
81  
84  
87  
90  
93  
96  
99  
102  
105  
108  
111  
114  
117  
120  
123  
126  
129  
132  
135  
138  
141  
144  
147  
150  
153  
156  
159  
162  
165  
168  
171  
174  
177  
180  
183  
186  
189  
192  
195  
198  
201  
204  
207  
210  
213  
216  
219  
222  
225  
228  
231  
234  
237  
240  
243  
246  
249  
252  
255  
258  
261  
264  
267  
270  
273  
276  
279  
282  
285  
288  
291  
294  
297  
300  
303  
306  
309  
312  
315  
318  
321  
324  
327  
330  
333  
336  
339  
342  
345  
348  
351  
354  
357  
360  
363  
366  
369  
372  
375  
378  
381  
384  
387  
390  
393  
396  
399  
402  
405  
408  
411  
414  
417  
420  
423  
426  
429  
432  
435  
438  
441  
444  
447  
450  
453  
456  
459  
462  
465  
468  
471  
474  
477  
480  
483  
486  
489  
492  
495  
498  
501  
504  
507  
510  
513  
516  
519  
522  
525  
528  
531  
534  
537  
540  
543  
546  
549  
552  
555  
558  
561  
564  
567  
570  
573  
576  
579  
582  
585  
588  
591  
594  
597  
600  
603  
606  
609  
612  
615  
618  
621  
624  
627  
630  
633  
636  
639  
642  
645  
648  
651  
654  
657  
660  
663  
666  
669  
672  
675  
678  
681  
684  
687  
690  
693  
696  
699  
702  
705  
708  
711  
714  
717  
720  
723  
726  
729  
732  
735  
738  
741  
744  
747  
750  
753  
756  
759  
762  
765  
768  
771  
774  
777  
780  
783  
786  
789  
792  
795  
798  
801  
804  
807  
810  
813  
816  
819  
822  
825  
828  
831  
834  
837  
840  
843  
846  
849  
852  
855  
858  
861  
864  
867  
870  
873  
876  
879  
882  
885  
888  
891  
894  
897  
900  
903  
906  
909  
912  
915  
918  
921  
924  
927  
930  
933  
936  
939  
942  
945  
948  
951  
954  
957  
960  
963  
966  
969  
972  
975  
978  
981  
984  
987  
990  
993  
996  
999

AGACCGGCGCAAGTTGGAGATATCTGCATTTTCGGTCATCATCTGATCTTCGCACCAACTACAGTCGGC  
R P A Q v G D I C I F G H H L I F A P T T V G

AAAGAAGTTCAGACAATGCAGAAGAGTTCCTGGCTTCTGCATAAAGCCGTCGATCGAGTACTTTGTGAG  
K E v P D N A E E F W L L H K A v D R v L C E

CCAATTTCCAAGGAAAATCCACAGAGAGGAGGGCTTCTGGCGCTGAAATGCAAAAATTCCTATTGATT  
P I S K E N P Q R G G L L A L K C K N F L L I

ATTTTCGAAATTGGAGATTTGGAAATTTGCAGAGCAACGGCGAGAACAATGAATCTTTGTGCAATATT  
I F E I G D L E I C P R A T A R T I E S L S N I

Agt-1237 nt-cagACGGCTTCCTCCAGACTACGCATTTCTTCTACAACCTCCCATTACAAATTCTC  
N G F L H D Y A F F Y N S P F T I L

CGATGGCTGGAGCGCATTCGATCTGGAGCAAGAGTTCGCAAGGCTTATGCTCTCCACAGATGCCTT  
D D G W S A F D L E Q E F A R L M L S T D A F

CGAATTTCCAGTGTTAACGAGAAATTTGCGATTTGTCCGACTTACCCGAAAAACTGATTGTTCCAAA  
R I S S v N E N F A I C P T Y P E K L I v P P K

GGAATCGGAGATGATTATTTGAAAATCTCGGCCACATTCGCTGAAGGTGGCCGATTTCGGTGCTCAGC  
G I G D D Y L K I S A T F R E G G R F P v L S

TATTTTCATAAAGAGACCAAATCGCCGTTGGTTCAGATGCTCTCAGCCATTGATTGGGCCGACGAATCGA  
Y F H K E T K S P L v R C S Q P L I G P T N R

CGGTGTCGCGAAGATGAGACGATCCTGAACCTCGATGATTACGGTTAATAGAGGATATATATTGATACT  
R C R E D E T I L N S M I T v N R G Y I I D T

AGGAGTAAATCATCGGCTACTGCGGCGAAGGCTAAAGGTGGAGGTGCCGAGCCGCAAGGCAATTATAG  
R S K S S A T A A K A K G G G A E P Q G N Y R

CAGTGGAGATATATTCAGgt-1194 nt-cagTGCCCAATCCCCGCCAGCGAGAATTCACGATGCTCTA  
Q W R Y I Q C P I P R Q R E I H D A L

ACACGAATGGTCGACGTGTGCTCCGAACGAAAAGTGACATCGGATCGATGGGTCAGCCGAGTTGGACAA  
T R M v D v C S E R K v T S D R W v S R v G Q

GCTGGATGGTTATCCTCTGTGGCCGCATCGCTAGAAGCCGCTGCAAAATGTTGCTCAATGTATCTATAAT  
A G W L S S v A A S L E A A A N v A Q C I Y N

GAGAGGCTCGAAGAGGTTCCGGTGGTGATTCACGGTGGAGATGGACTCGATTCTGACTCTGATTGCTTCA  
E R L E E v P v v I H G G D G L D S T L I A S

TCGTTGGCGCAGATTTTGGCTGGATGCAGATGCAGAGACGATCCGAGGgt-443 nt-cagATTTCGAATCA  
S L A Q I L L D A D A R T I R G F E S

GTAATCGAGCGAGAATGGATCTGCGGCGGACACCCGTTTCAGTCTCCGTAACAACCATTCGCGCTACGCA  
V I E R E W I C G G H P F S L R N N H C A Y A

GAGGGTACTGTAACCGGCCCCCTTGAGTCGCCGCTTCCCTCGTCTTCCCTCGACGCCGTCATCAAATG  
E G T v T G P F E S P v F L v F L D A v H Q M

376  
4086  
4399  
4155  
422

|                                                                                                                                                                                                                                                                                                                                                                                                                                                                                                                                                                                                                                                                                                  |      |
|--------------------------------------------------------------------------------------------------------------------------------------------------------------------------------------------------------------------------------------------------------------------------------------------------------------------------------------------------------------------------------------------------------------------------------------------------------------------------------------------------------------------------------------------------------------------------------------------------------------------------------------------------------------------------------------------------|------|
| ATCGCCCAATATCCAATGTCATTCGAGTTCGACGAGAATTTTCTCATCTTTTGTTCGAGCAGCCTAC                                                                                                                                                                                                                                                                                                                                                                                                                                                                                                                                                                                                                              | 4224 |
| I A Q Y P M S F E F D E N F L I F L F E H A Y                                                                                                                                                                                                                                                                                                                                                                                                                                                                                                                                                                                                                                                    | 445  |
| GCATCGGAATTTGGAAGCTTTTGGGAAATTTGTGAAAAGGAGAAGAAGGATAACGGAATCCGAAAAAG                                                                                                                                                                                                                                                                                                                                                                                                                                                                                                                                                                                                                             | 4296 |
| A S E F G S F L G N C E K E K K D N G I R K K                                                                                                                                                                                                                                                                                                                                                                                                                                                                                                                                                                                                                                                    | 468  |
| ACTGTCTCACTGTGGTCTCATGTTACCACCCGAAAATATGAAACAATTTGTGAATGTTGTACGAT                                                                                                                                                                                                                                                                                                                                                                                                                                                                                                                                                                                                                                | 4362 |
| T V S L W S H V H H P E N M K Q F V N V C Y D                                                                                                                                                                                                                                                                                                                                                                                                                                                                                                                                                                                                                                                    | 491  |
| CCGACGCCCGGCGTTATTTGGCCCAGTATTGCGCCACAGTGTATTgt-1088nt-cagAAAATCTGG                                                                                                                                                                                                                                                                                                                                                                                                                                                                                                                                                                                                                              | 5509 |
| P T P G V I W P S I A P Q C I                                                                                                                                                                                                                                                                                                                                                                                                                                                                                                                                                                                                                                                                    | 509  |
| GATCGCCTCTTCTTCGCTGGCAGCGCCCCGACAACAGTTGGTCGACACCCGAAACCGAAACCATTCAA                                                                                                                                                                                                                                                                                                                                                                                                                                                                                                                                                                                                                             | 5578 |
| D R L F F R W Q R P D N S W S T P E T E T I Q                                                                                                                                                                                                                                                                                                                                                                                                                                                                                                                                                                                                                                                    | 532  |
| AGTTTGGCCGATCATTTGGAAGCTCCGCGAGAAGGAGCTCATCGAAAAGCATCATCGCTCCGTCGAAGT                                                                                                                                                                                                                                                                                                                                                                                                                                                                                                                                                                                                                            | 5647 |
| S L A D H W K L R E K E L I A K A S S L R R S                                                                                                                                                                                                                                                                                                                                                                                                                                                                                                                                                                                                                                                    | 555  |
| GTCGTCGAACTTTTCGAGAGAACTTCGCGTTTTGTGCGCAATGTAGTAGTGATCTCTTGTGCAAATAT                                                                                                                                                                                                                                                                                                                                                                                                                                                                                                                                                                                                                             | 5692 |
| V V E L S R E L R V L S P M *                                                                                                                                                                                                                                                                                                                                                                                                                                                                                                                                                                                                                                                                    | 570  |
| <div style="text-align: center;"> <span style="display: inline-block; width: 1em; height: 1em; background-color: black; margin-right: 0.5em;"></span> <span style="display: inline-block; width: 1em; height: 1em; background-color: black; margin-right: 0.5em;"></span> <span style="display: inline-block; width: 1em; height: 1em; background-color: black; margin-right: 0.5em;"></span> <span style="display: inline-block; width: 1em; height: 1em; background-color: black; margin-right: 0.5em;"></span> <span style="display: inline-block; width: 1em; height: 1em; background-color: black;"></span> </div><br>TGAAATTTCCAGTAAATTGTAGTTGTTCCCTCCTGTGTGCATAATTTATTATACTAACGCTTTCCACCA | 5785 |
| <div style="text-align: center;"> <span style="display: inline-block; width: 1em; height: 1em; background-color: black; margin-right: 0.5em;"></span> <span style="display: inline-block; width: 1em; height: 1em; background-color: black; margin-right: 0.5em;"></span> <span style="display: inline-block; width: 1em; height: 1em; background-color: black; margin-right: 0.5em;"></span> <span style="display: inline-block; width: 1em; height: 1em; background-color: black;"></span> </div><br>CTTGTACTGAAAATTTGAAAAATATGAAAATTTCTATGAATTTTCTGAAATTTACTTTT                                                                                                                               |      |

..... -GRAM  
 ===== -RID  
 ~~~~~~ -Phosphatase  
 ~~~~~~ -SID

# Figure 2 Supplementary
